# Supplementary material for: Synergistic Charge Storage Enhancement in Supercapacitors via Ti3C2Tx MXene and CoMoO4 Nanoparticles
Source: MDPI journal article supplement (doi:10.3390/mi15020234), 2024-02-01
Supplement: s1 [file s1]

# **Supplementary Material**

## **Synergistic Charge Storage Enhancement in Supercapacitors via $\text{Ti}_3\text{C}_2\text{T}_x$ MXene and $\text{CoMoO}_4$ Nanoparticles**

Christine Young <sup>\*</sup>, An-Yi Wu and Ri-Yu Li

*Functional Nanoporous Materials Laboratory, Department of Chemical and Materials Engineering, National Yunlin University of Science and Technology, Yunlin 640, Taiwan*

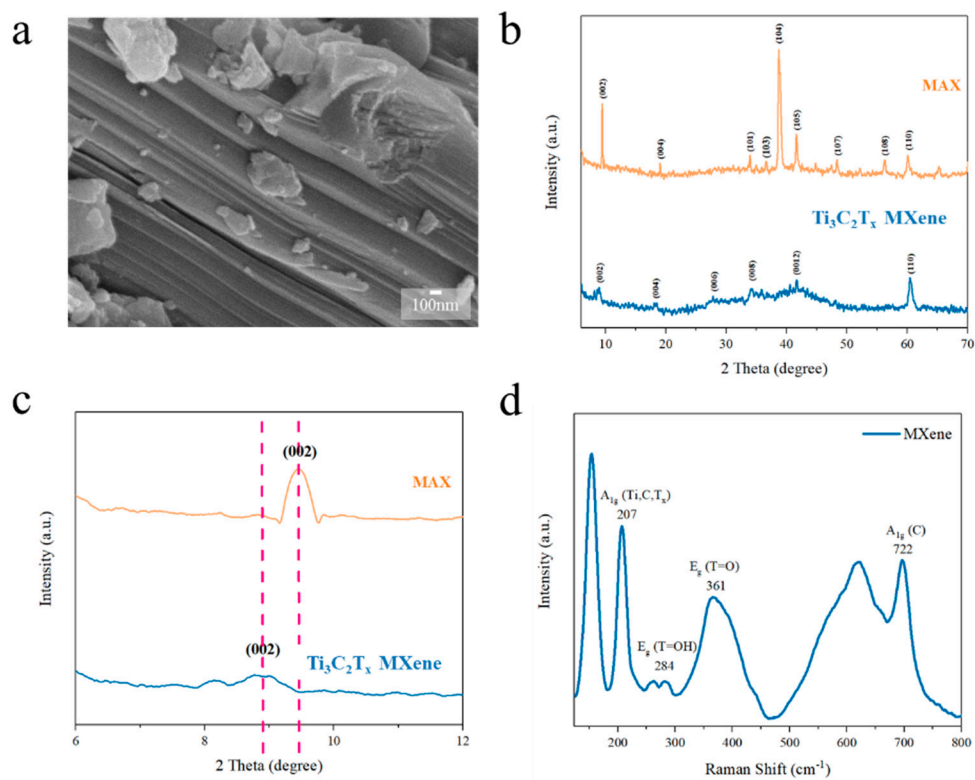

Figure S1. (a) SEM image of MAX. (b,c) XRD patterns of MAX and  $\text{Ti}_3\text{C}_2\text{T}_x$  MXene. (d) Raman spectrum of  $\text{Ti}_3\text{C}_2\text{T}_x$  MXene.

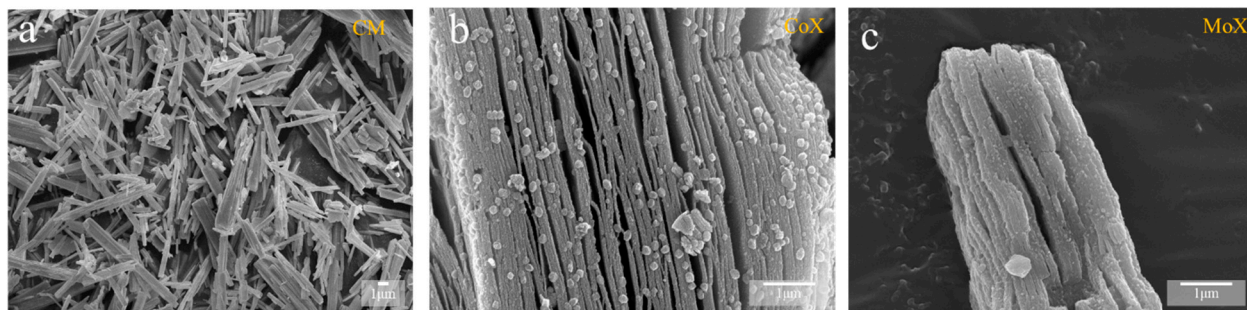

Figure S2. SEM images of (a) CM, (b) CoX, and (c) MoX.

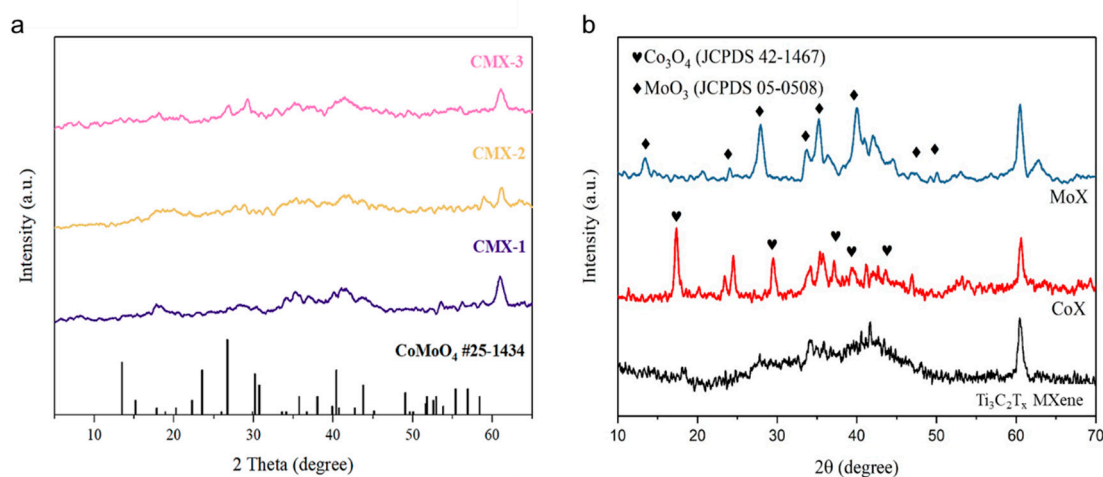

Figure S3. (a) XRD patterns of CMX-1, CMX-2, and CMX-3. (b) XRD patterns of  $\text{Ti}_3\text{C}_2\text{T}_x$  MXene, CoX, and MoX.

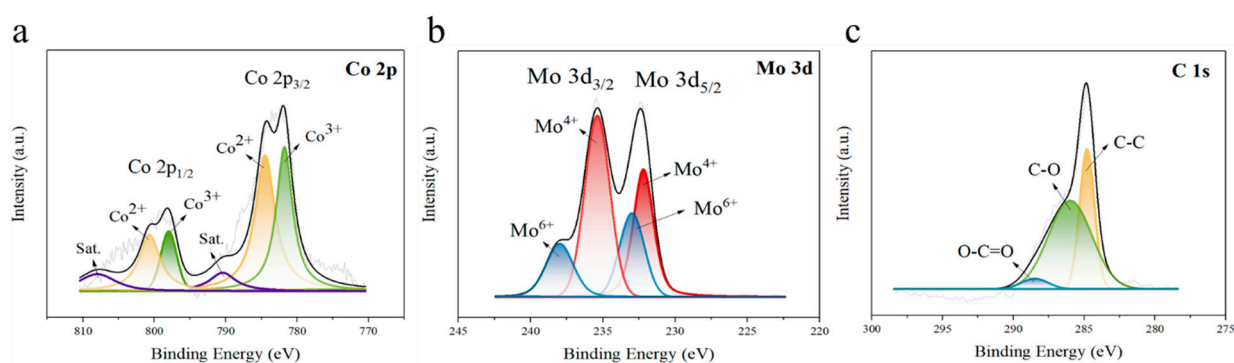

Figure S4. High resolution XPS spectra showing the (a) Co 2p, (b) Mo 3d and (c) C 1s for CMX-1.

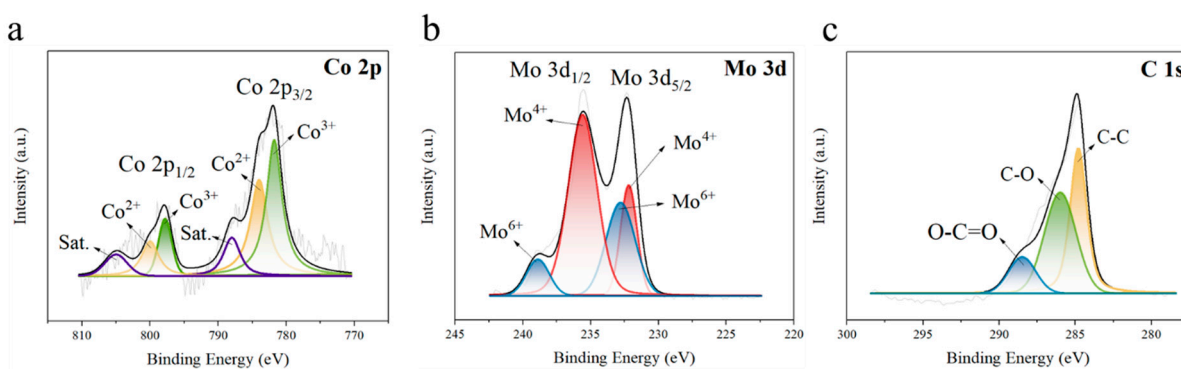

Figure S5. High resolution XPS spectra showing the (a) Co 2p, (b) Mo 3d and (c) C 1s for CMX-3.

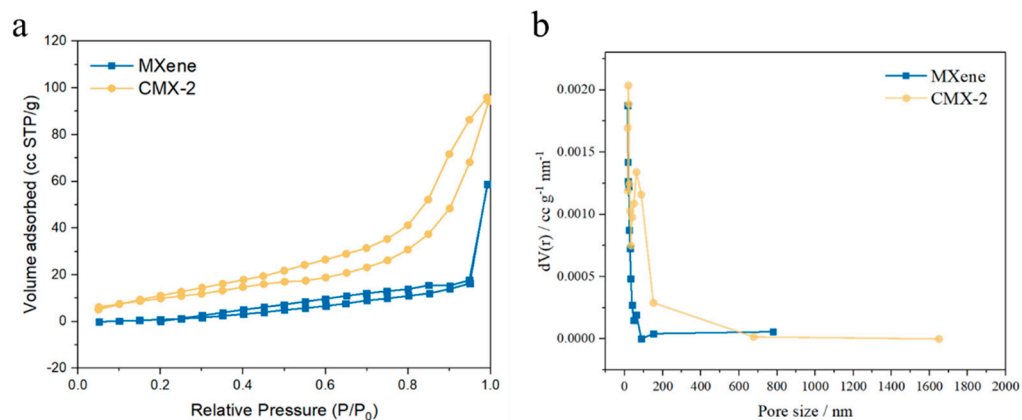

Figure S6. (a) Nitrogen adsorption-desorption isotherms for Ti<sub>3</sub>C<sub>2</sub>T<sub>x</sub> MXene and CMX-2. (b) Pore size distribution of Ti<sub>3</sub>C<sub>2</sub>T<sub>x</sub> MXene and CMX-2 determined using BJH method.

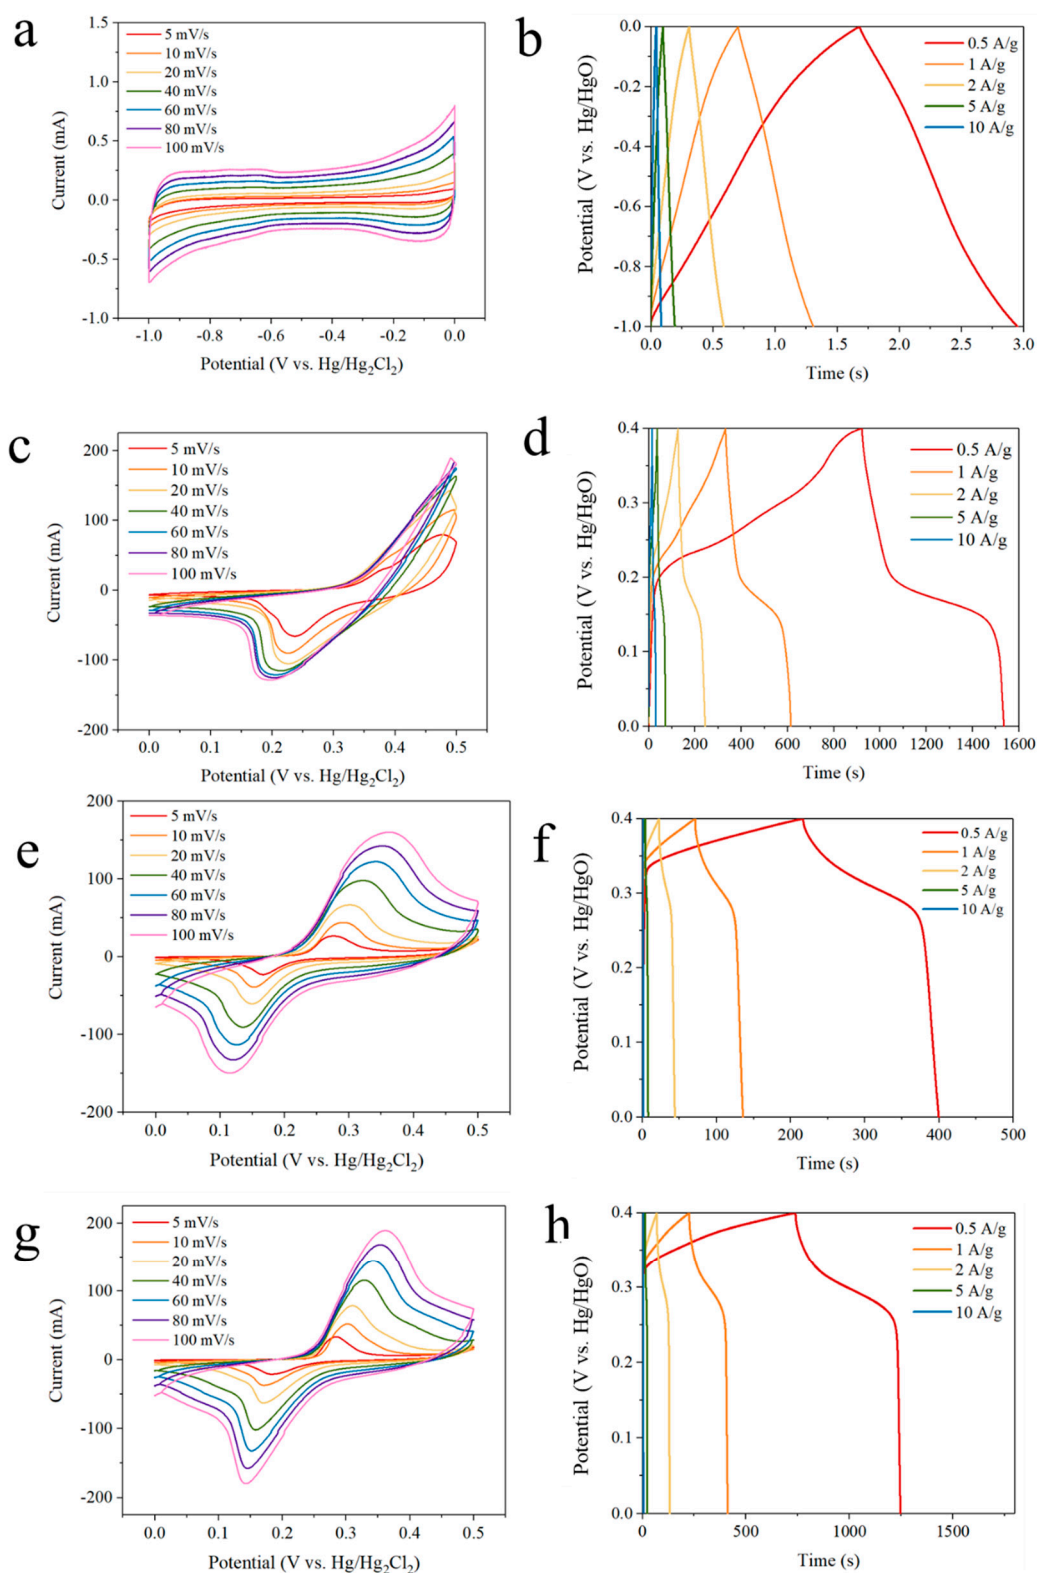

Figure S7. CV curves and GCD curves of (a,b)  $\text{Ti}_3\text{C}_2\text{T}_x$  MXene, (c,d) CM, (e,f) CoX, and (g,h) MoX.

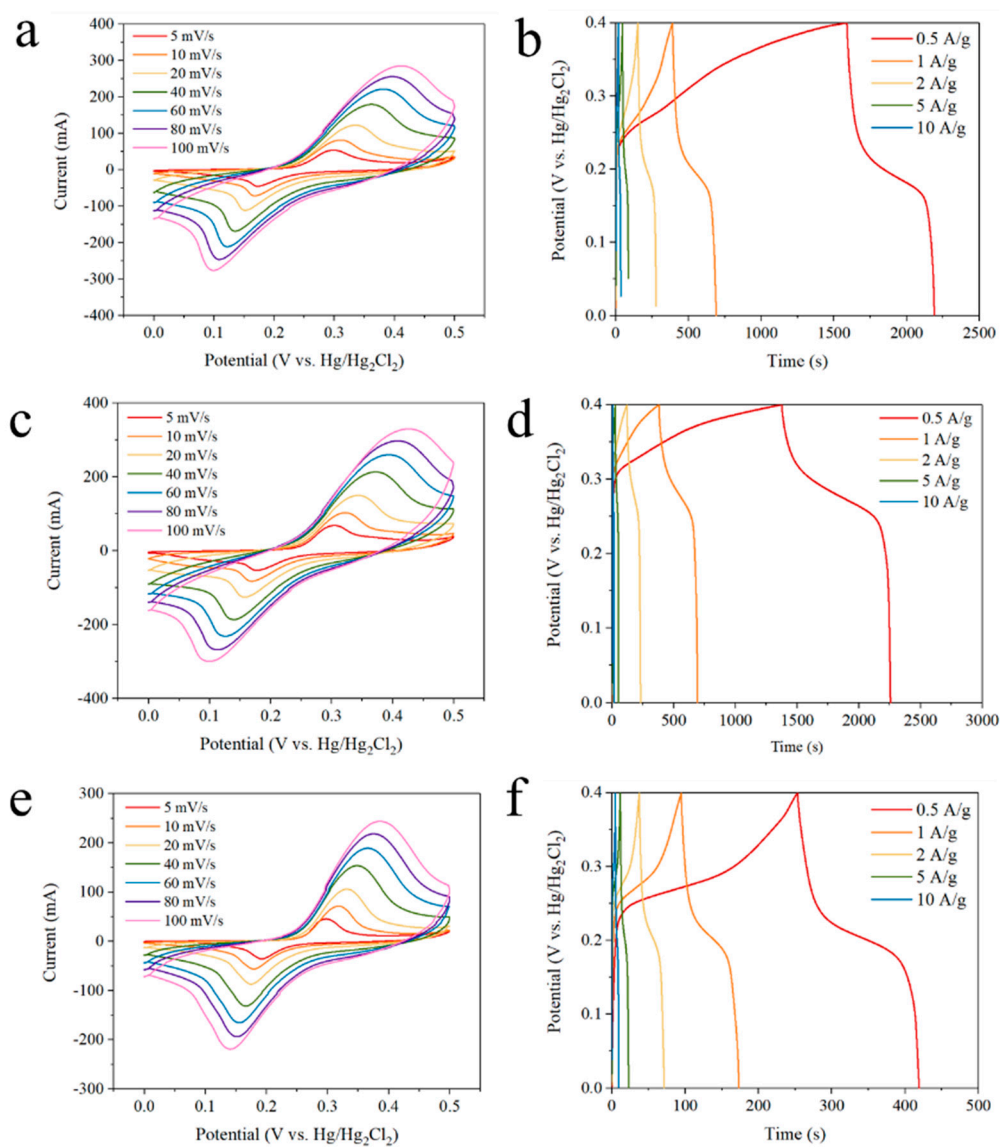

Figure S8. CV curves and GCD curves of (a,b) CMX-1, (c,d) CMX-2, and (e,f) CMX-3.

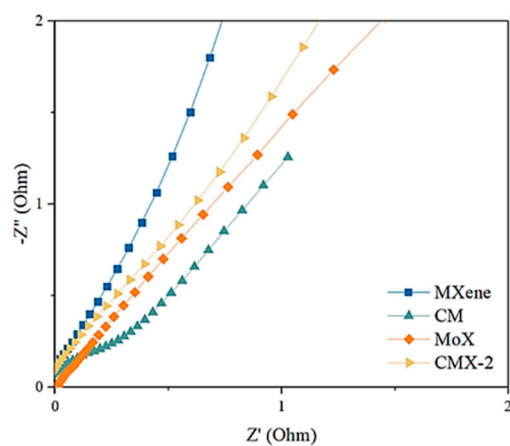

Figure S9. The Nyquist plot of Ti<sub>3</sub>C<sub>2</sub>T<sub>x</sub> MXene, CM, MoX, and CMX-2.

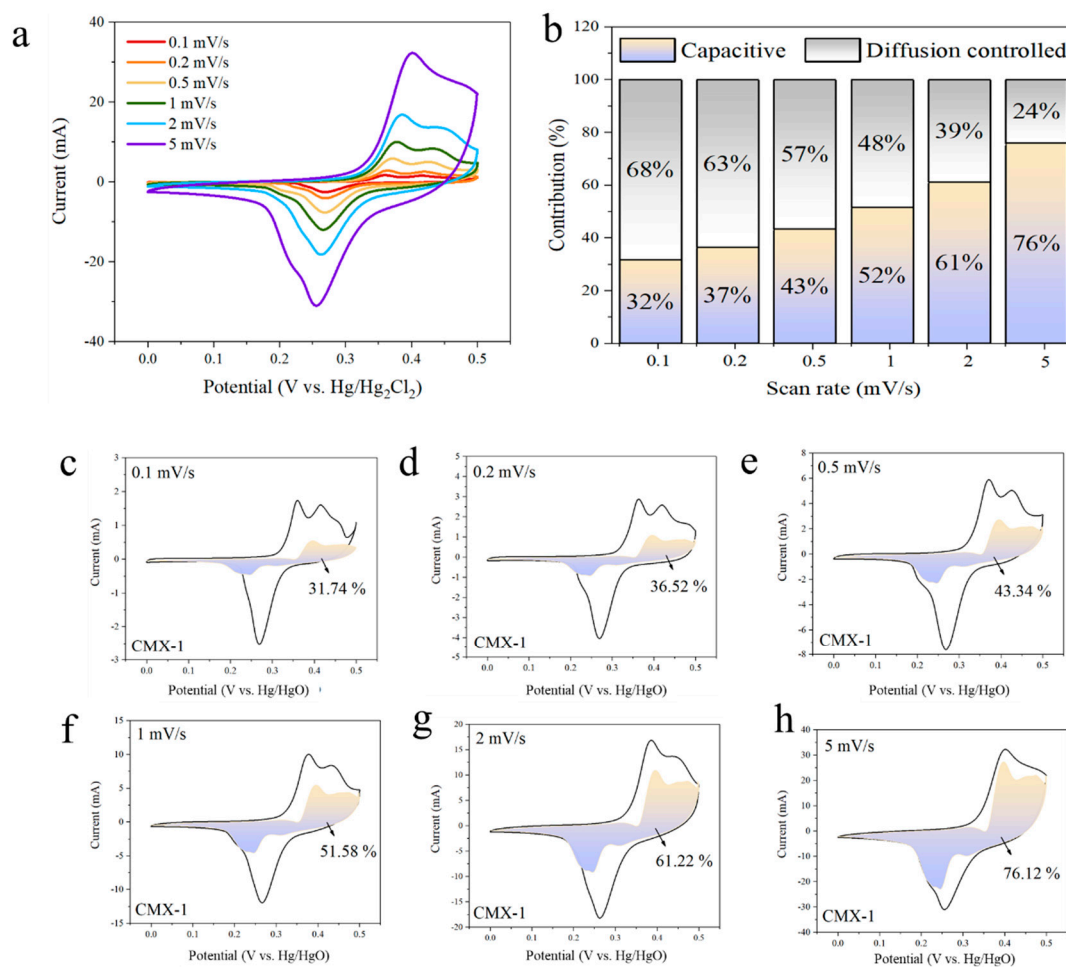

Figure S10. (a) CV curves of CMX-1 at the scan rates of 0.1, 0.2, 0.5, 1, 2, 5 mV s<sup>-1</sup>. (b) Capacitive and diffusion controlled contribution at various scan rates for CMX-1. (c–h) CV curves showing the capacitive and diffusion-controlled contributions at the scan rates ranging from 0.1 to 5 mV s<sup>-1</sup>.



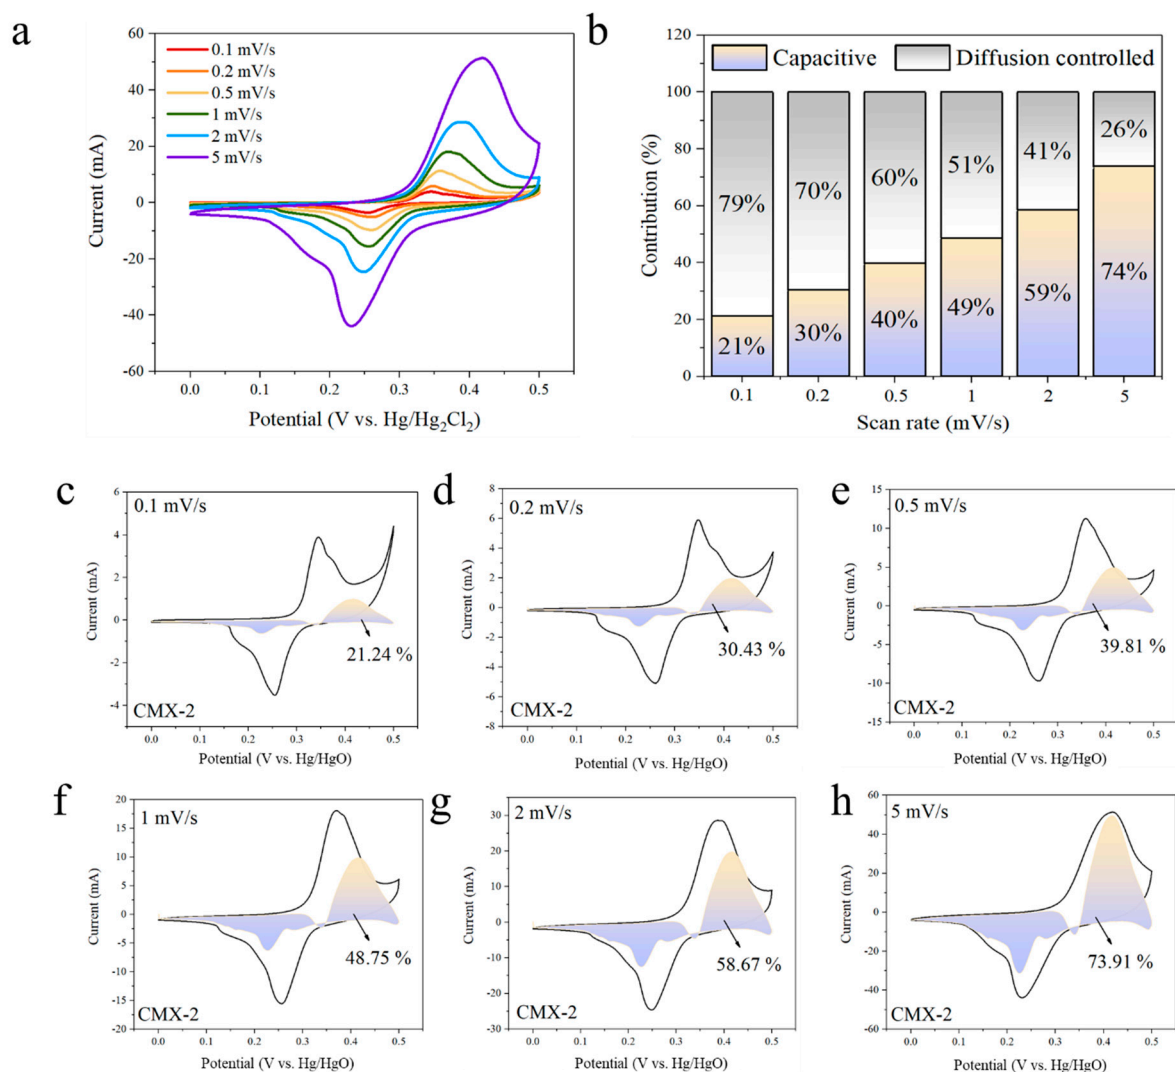

Figure S11. (a) CV curves of CMX-2 at the scan rates of 0.1, 0.2, 0.5, 1, 2, 5  $\text{mV s}^{-1}$ . (b) Capacitive and diffusion controlled contribution at various scan rates for CMX-2. (c–h) CV curves showing the capacitive and diffusion-controlled contributions at the scan rates ranging from 0.1 to 5  $\text{mV s}^{-1}$ .



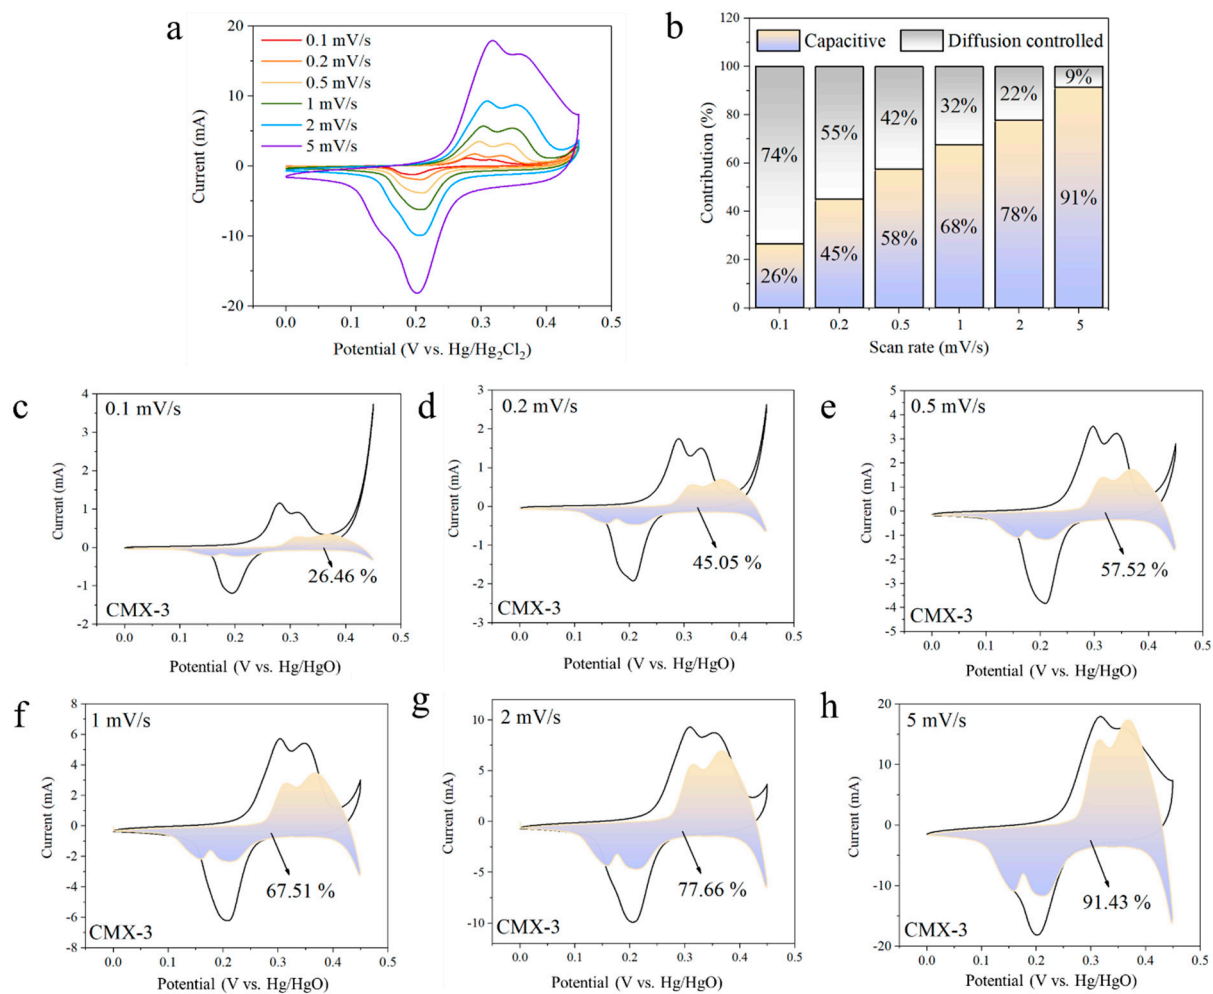

Figure S12. (a) CV curves of CMX-3 at the scan rates of 0.1, 0.2, 0.5, 1, 2, 5  $\text{mV s}^{-1}$ . (b) Capacitive and diffusion controlled contribution at various scan rates for CMX-3. (c–h) CV curves showing the capacitive and diffusion-controlled contributions at the scan rates ranging from 0.1 to 5  $\text{mV s}^{-1}$ .

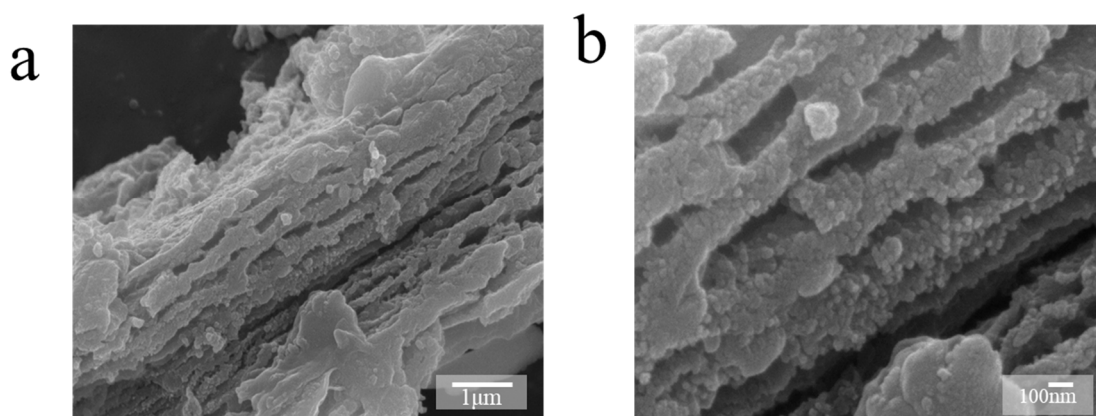

Figure S13. SEM images of CMX-2 after stability test.

Table S1. The element component ratio of CMX-1, CMX-2, and CMX-3.

| Sample | C (at%) | O (at%) | Co (at%) | Mo (at%) | Ti (at%) | Al (at%) |
|--------|---------|---------|----------|----------|----------|----------|
| CMX-1  | 50.2    | 31.6    | 10.0     | 6.6      | 1.6      | <0.1     |
| CMX-2  | 60.6    | 28.0    | 5.1      | 4.5      | 1.8      | <0.1     |
| CMX-3  | 58.6    | 27.4    | 4.9      | 6.5      | 2.6      | <0.1     |
